# Supplementary material for: Respiratory diseases and allergy in farmers working with livestock: a EAACI position paper
Source: PubMed Central journal article supplement (PMC7336421; doi:10.1186/s13601-020-00334-x), 2020-07-06
Supplement: 13601_2020_334_MOESM1_ESM.pdf [file 13601_2020_334_MOESM1_ESM.pdf]

# Respiratory diseases and allergy in farmers working with large animals and Poultry: A EAACI Position paper

Appendix 1 Search strategy *Update: (sept 2019)*

## 1.1 Restrictions:

1. Farm work-related exposures
2. Livestock: cattle or/or swine farming
3. (work-related) asthma and rhinitis and COPD, in adulthood

## 1.2 Exclusion

- farm childhood exposure vs asthma/rhinitis/allergy in children
- ODS, HP
- URT and LRT infectious disease

## 1.3 Comments/questions & in/exclusion:

**Focus** (*see also objectives of Task Force*):

1. Epidemiological studies on incidence/prevalence of asthma and rhinitis in farmers/farm workers
2. Studies on exposure in livestock farming – any (major) qualitative (other agents?) or quantitative changes during last decades, due to upscaling of livestock farming?
3. Dose-response relations between exposure levels and the risk of asthma/rhinitis among farmers/farm worker?
4. new insights re the pathogenesis of farm-related asthma and rhinitis
5. The paradox: farm exposure's *protection* against asthma/allergy/rhinitis  $\leftrightarrow$  farm-exposure as *risk factor* for asthma and rhinitis?
6. Prevention measures: effectiveness of primary and/or secondary prevention?

*For these topics strict focus on **primary literature** from the **last 10-15 years** – studies performed (=data collected) after 2000. In case of abundance in one or more of the 5 focus areas, selection with as criteria:*

- ~equal numbers of primary papers (if possible, at least 5-10) in each of the six focus areas;
- date of publication (or better: study date/period); priority for most recent papers
- geographical distribution/coverage – trying to incorporate studies from a variety of geographic regions worldwide (restriction to industrialized world)

## Literature Search strategy (MEDLINE/PubMed)

### 1.3.1 Step A:

A series of papers on respiratory health risks (priority: asthma and rhinitis) and associated exposure factors in livestock farming; published 2011-17 – mainly reviews:

| <i>Authors</i>               | <i>Journal</i>               | <i>PY</i> | <i>Topic</i>                     |
|------------------------------|------------------------------|-----------|----------------------------------|
| <b>Basinas et al.</b>        | J Exp Sci Environ Epidemiol  | 2015      | Exposure                         |
| <b>Bolund</b>                | Occup Environ Med            | 2017      | Dose-response lung function      |
| <b>Luong Thanh</b>           | Cochrane Rev                 | 2016      | Prevention in Occup settings     |
| <b>May</b>                   | J Tox Env Health             | 2012      | Mechanisms                       |
| <b>Nordgren &amp; Bailey</b> | Curr Op Resp Med             | 2016      | General/clinical/diagnosis       |
| <b>Poole</b>                 | Ann Asthma Allergy Immunol   | 2012      | Exposure factors                 |
| <b>Poole &amp; Romberger</b> | Curr Op Allergy Clin Immunol | 2012      | Mechanisms                       |
| <b>Reynolds</b>              | J Agromed                    | 2013      | General dairy farming            |
| <b>von Essen</b>             | J Agromed                    | 2010      | Prevention/NIOSH recommendations |
| <b>Wunschel &amp; Poole</b>  | J Asthma                     | 2016      | General/risk factors             |

### 1.3.2 Step B:

Inventory of all MeSH terms added in MEDLINE to these papers; MESH terms sorted on frequency with which they were. After exclusion of terms considered non-specific or not relevant, and terms used only once (numbers give frequency of use):

| MeSH term                                           | #  |
|-----------------------------------------------------|----|
| Occupational Exposure                               | 12 |
| Animals                                             | 8  |
| Endotoxins/adverse effects                          | 7  |
| Dust                                                | 7  |
| Lung Diseases/chemically induced*                   | 6  |
| Air Pollutants, Occupational/adverse effects        | 5  |
| Occupational Diseases*/epidemiology                 | 5  |
| Pulmonary Disease, Chronic Obstructive/epidemiology | 5  |
| Agriculture*                                        | 4  |
| Agricultural Workers' Diseases/chemically induced*  | 4  |
| Asthma/epidemiology                                 | 4  |
| Animal Husbandry*                                   | 3  |
| Respiratory Tract Diseases/epidemiology             | 3  |
| Bronchitis, Chronic/epidemiology                    | 3  |
| Aerosols                                            | 2  |
| Cattle                                              | 2  |
| Dairying                                            | 2  |
| Livestock                                           | 2  |
| Swine                                               | 2  |
| Hypersensitivity/epidemiology                       | 2  |

### 1.4.3 Step C:

Check position of these terms in MeSH thesaurus tree (eg. asthma and rhinitis in the tree of 'respiratory tract diseases'; 'livestock' in tree 'animals')

### 1.4.4 Step D:

Search in Pubmed/MEDLINE for items indexed with "MESH terms" or "MESH major topics"

| <b>Search in MEDLINE for items indexed with MESH terms or MESH major topics</b> |               |                                              |                   |               |
|---------------------------------------------------------------------------------|---------------|----------------------------------------------|-------------------|---------------|
| <b>Set</b>                                                                      | <b>Search</b> | <b>Search term / combination</b>             |                   | <b>#hits</b>  |
| 1                                                                               | #2            | Occupational exposure                        | MeSH              | 61.209        |
| 2                                                                               | #3            | Occupational exposure/adverse effects        | MeSH              | 19.523        |
| 3                                                                               | #4            | Dust                                         | MeSH              | 21.590        |
| 4                                                                               | #5            | Aerosols                                     | MeSH              | 30.333        |
| 5                                                                               | #6            | Endotoxins/adverse effects                   | MeSH              | 13.780        |
| 6                                                                               | #7            | Air pollutants, Occupational/adverse effects | MeSH              | 7.081         |
| <b>A</b>                                                                        |               | ANY (#2; #4-#7)                              |                   | 124.447       |
| <b>A1</b>                                                                       |               | ANY (#3; #4-#7)                              |                   | 86.933        |
|                                                                                 |               |                                              |                   |               |
| 7                                                                               | #12           | Agriculture                                  | MeSH              | 91.051        |
| 8                                                                               | #13           | Animal husbandry                             | MeSH              | 20.401        |
| 9                                                                               | #14           | Dairying                                     | MeSH              | 11.729        |
| 10                                                                              | #15           | Farms                                        | MeSH              | 1.631         |
| 11                                                                              | #16           | Cattle                                       | MeSH              | 341.390       |
| 12                                                                              | #20           | Swine                                        | MeSH              | 231.576       |
| 13                                                                              | #21           | Livestock                                    | MeSH              | 3.184         |
| <b>B</b>                                                                        |               | ANY (#12- #16; #20-#21)                      |                   | 608.084       |
|                                                                                 |               |                                              |                   |               |
| 14                                                                              | #23           | Respiratory tract diseases                   | MeSH              | 1.295.91<br>6 |
| 15                                                                              | #24           | Asthma                                       | MeSH              | 124.190       |
| 16                                                                              | #25           | Rhinitis                                     | MeSH              | 33.156        |
| 17                                                                              | #26           | Pulmonary Disease, Chronic Obstructive       | MeSH              | 52.575        |
| 18                                                                              | #27           | Lung diseases                                | MeSH              | 851.713       |
| 19                                                                              | #28           | Bronchitis, chronic                          | MeSH              | 1.724         |
| 20                                                                              | #29           | Hypersensitivity                             | MeSH              | 334.692       |
| <b>C</b>                                                                        |               | ANY (#4; #5; #12; #25; #27; #28; #29)        |                   | 1.496.52<br>3 |
|                                                                                 |               |                                              |                   |               |
| 21                                                                              | #31           | Agricultural Workers' Diseases               | MeSH              | 6.535         |
| 22                                                                              | #32           | Farmers OR workers OR occupational           | Title or Abstract | 261.287       |
| <b>D</b>                                                                        |               | #31OR #32                                    |                   | 264.470       |
|                                                                                 |               |                                              |                   |               |
| <b>E</b>                                                                        |               | A1 AND B AND C                               |                   | 798           |
|                                                                                 |               |                                              |                   |               |
| <b>F</b>                                                                        |               | E and D                                      |                   | <b>377</b>    |
|                                                                                 |               |                                              |                   |               |
| <b>G</b>                                                                        |               | F and PY >1999 (published since 2000)        |                   | <b>266</b>    |
